# Supplementary material for: Redox state switching of transition metals by deprotonation of the tridentate ligand 2,6-bis(imidazol-2-yl)pyridineElectronic supplementary information (ESI) available: Fig. S1: ORTEP view of the [Mn(1)2]2+ solvated complex. Fig. S2: ORTEP view of the [Mn(1)2]2+ non-solvated complex. Fig. S3: ORTEP view of the [Co(1 ? 2H)2]? complex. See http://www.rsc.org/suppdata/dt/b3/b313440g/
Source: Royal Society of Chemistry journal article supplement (doi:10.1039/b313440g), 2004-01-01
Supplement: b313440g.doc [file b313440g.doc]

Redox state switching of transition metals by deprotonation of the tridentate ligand 2,6-bis(imidazol-2-yl)pyridine

Gilles Stupka,a Ludovic Gremaud,a Gérald Bernardinelli,b and Alan F. Williamsa,*

a Department of Inorganic, Analytical and Applied Chemistry, University of Geneva, 30 quai Ernest Ansermet, CH 1211 Geneva 4, Switzerland Fax: ++ 41 22 379 6830; Tel: ++ 41 22 379 6425; E-mail: Alan.Williams@chiam.unige.ch

b Laboratory for X-ray crystallography, University of Geneva, 24 quai Ernest Ansermet, CH 1211 Geneva 4, Switzerland.

Supplementary material


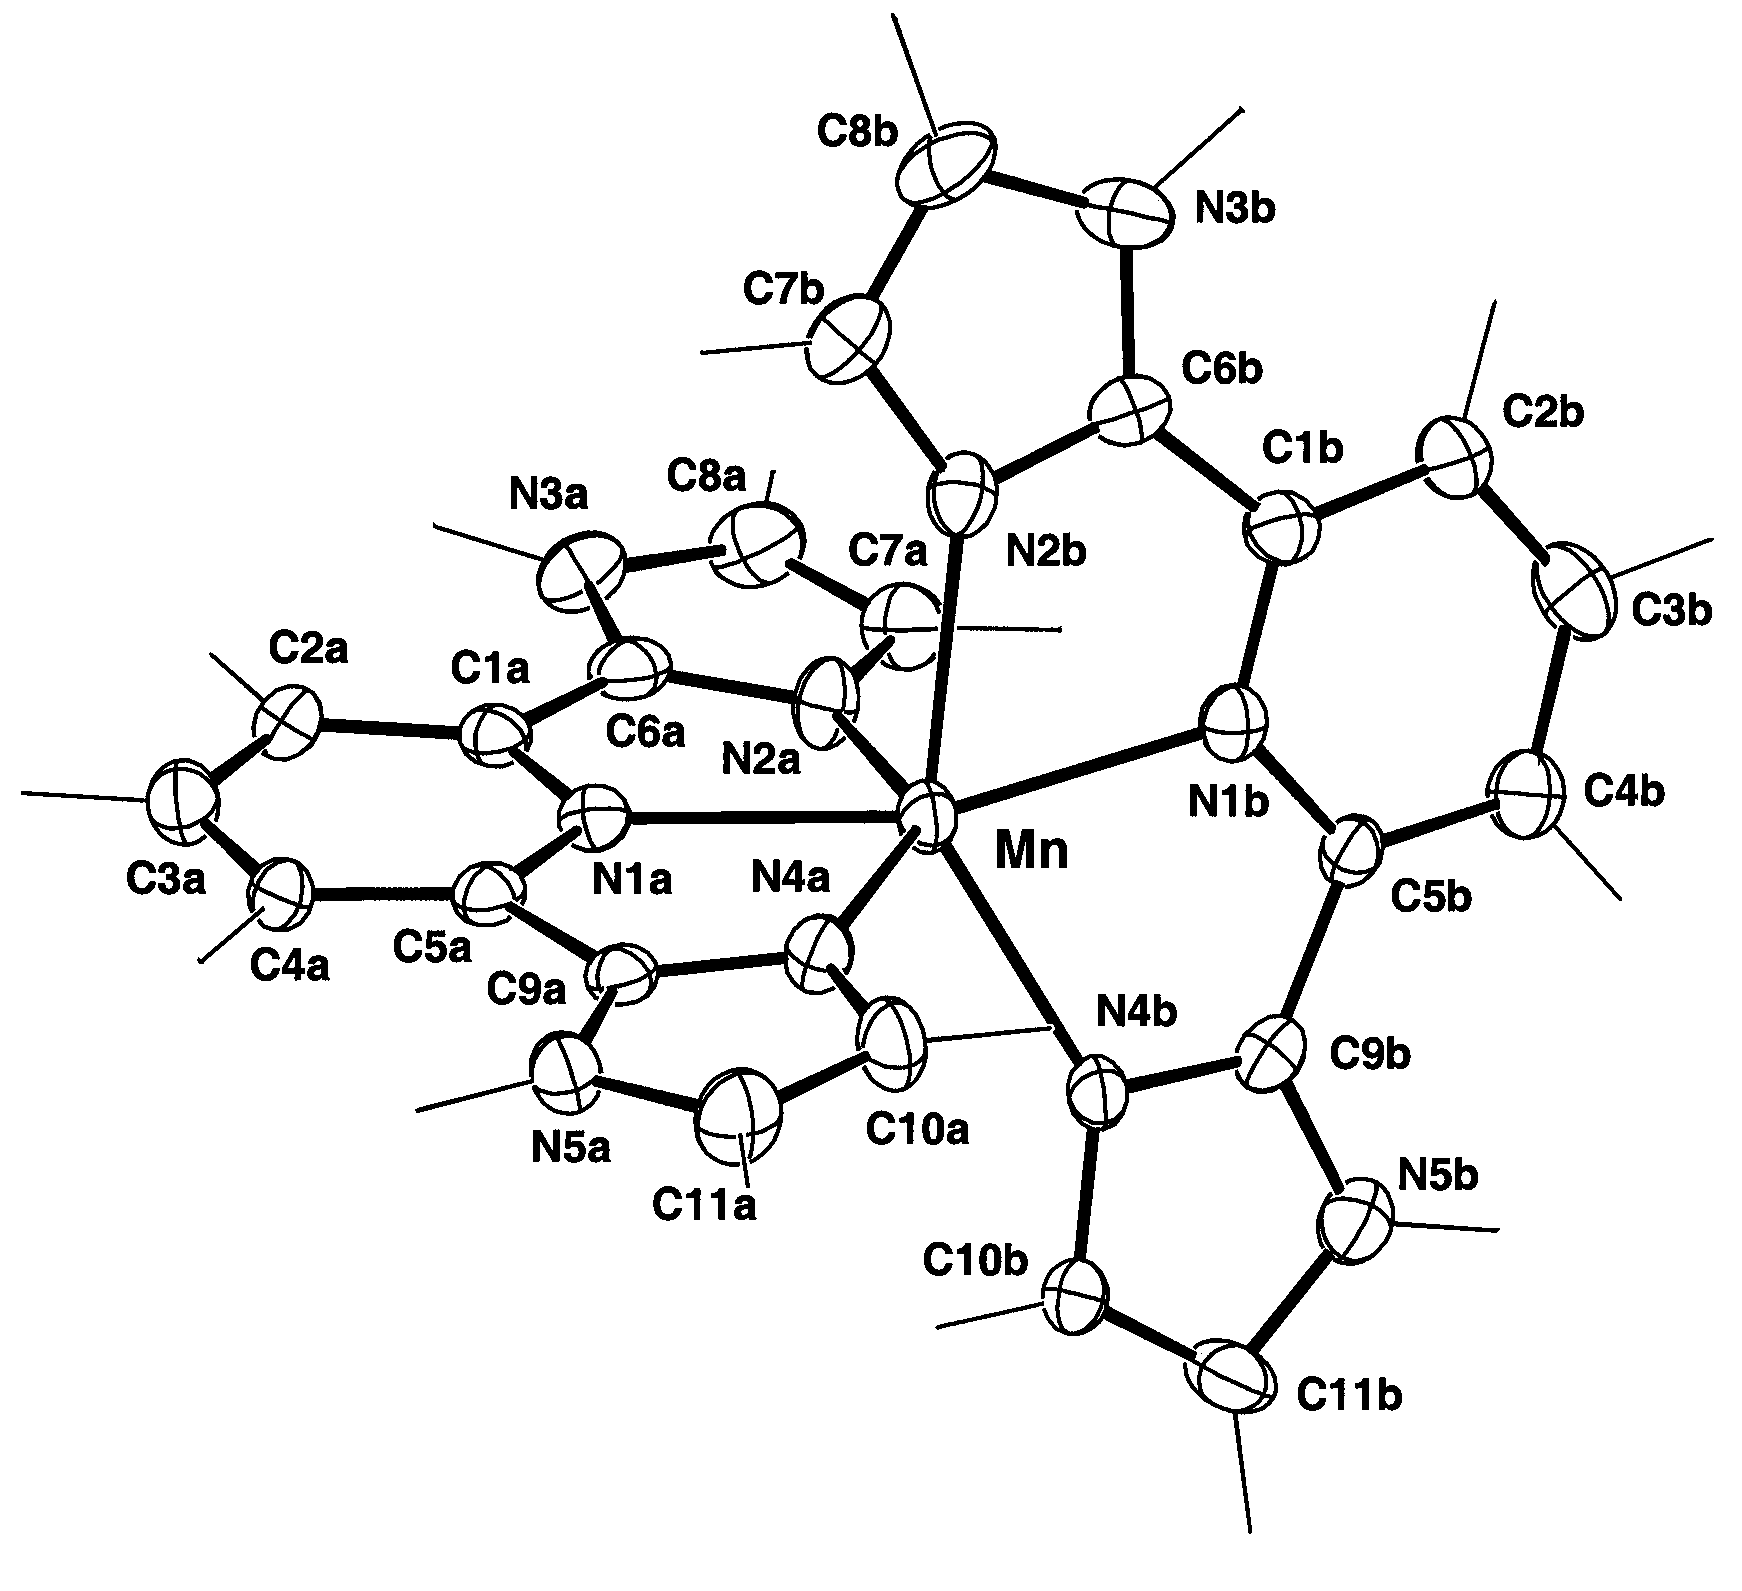


**Figure S1**. Ortep view of the [Mn(**1**)2]2+ solvated complex with atom numbering. Ellipsoids are represented with 50% probability.


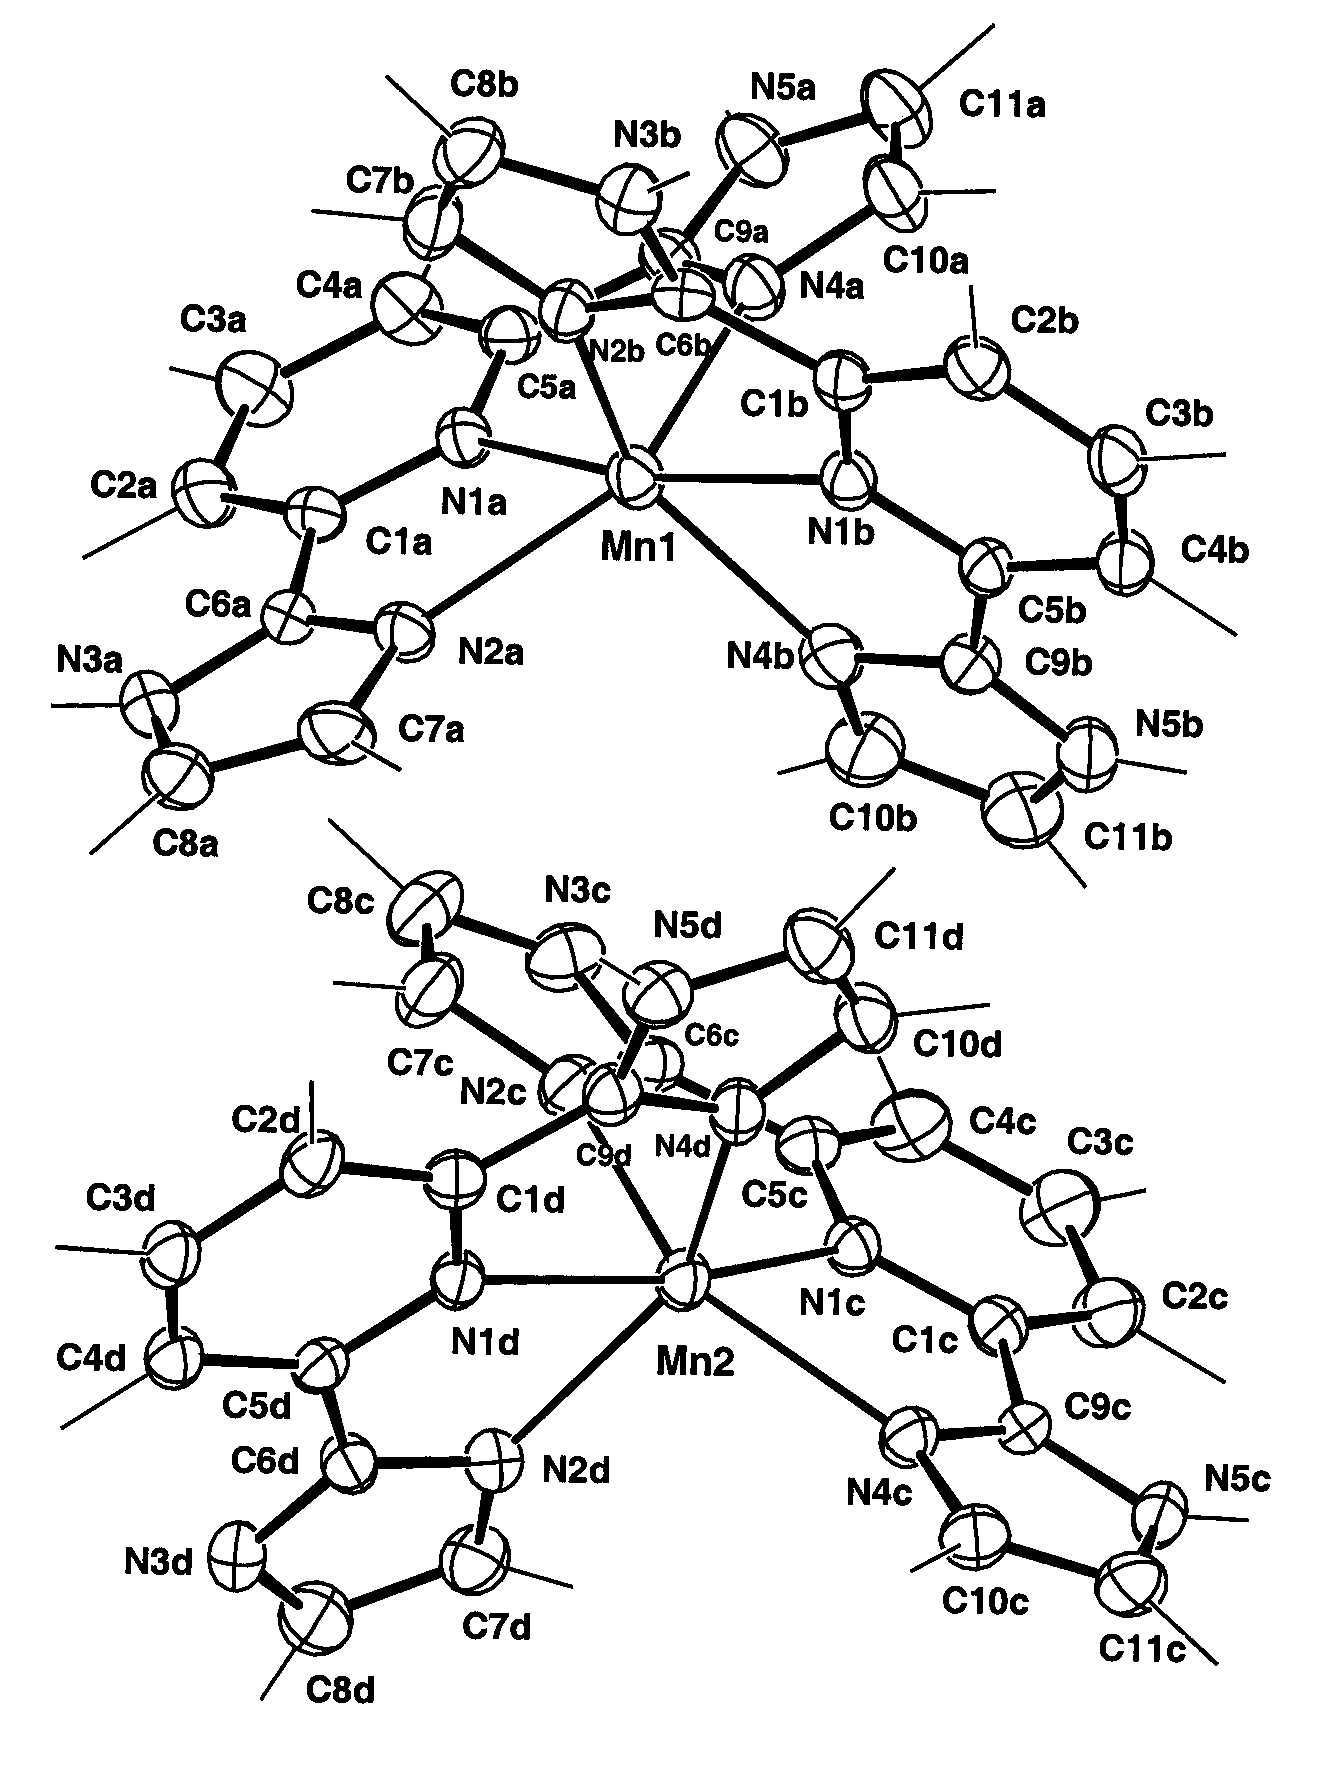


**Figure S2**. Ortep view of the [Mn(**1**)2]2+ non solvated complex with atom numbering. Ellipsoids are represented with 40% probability.


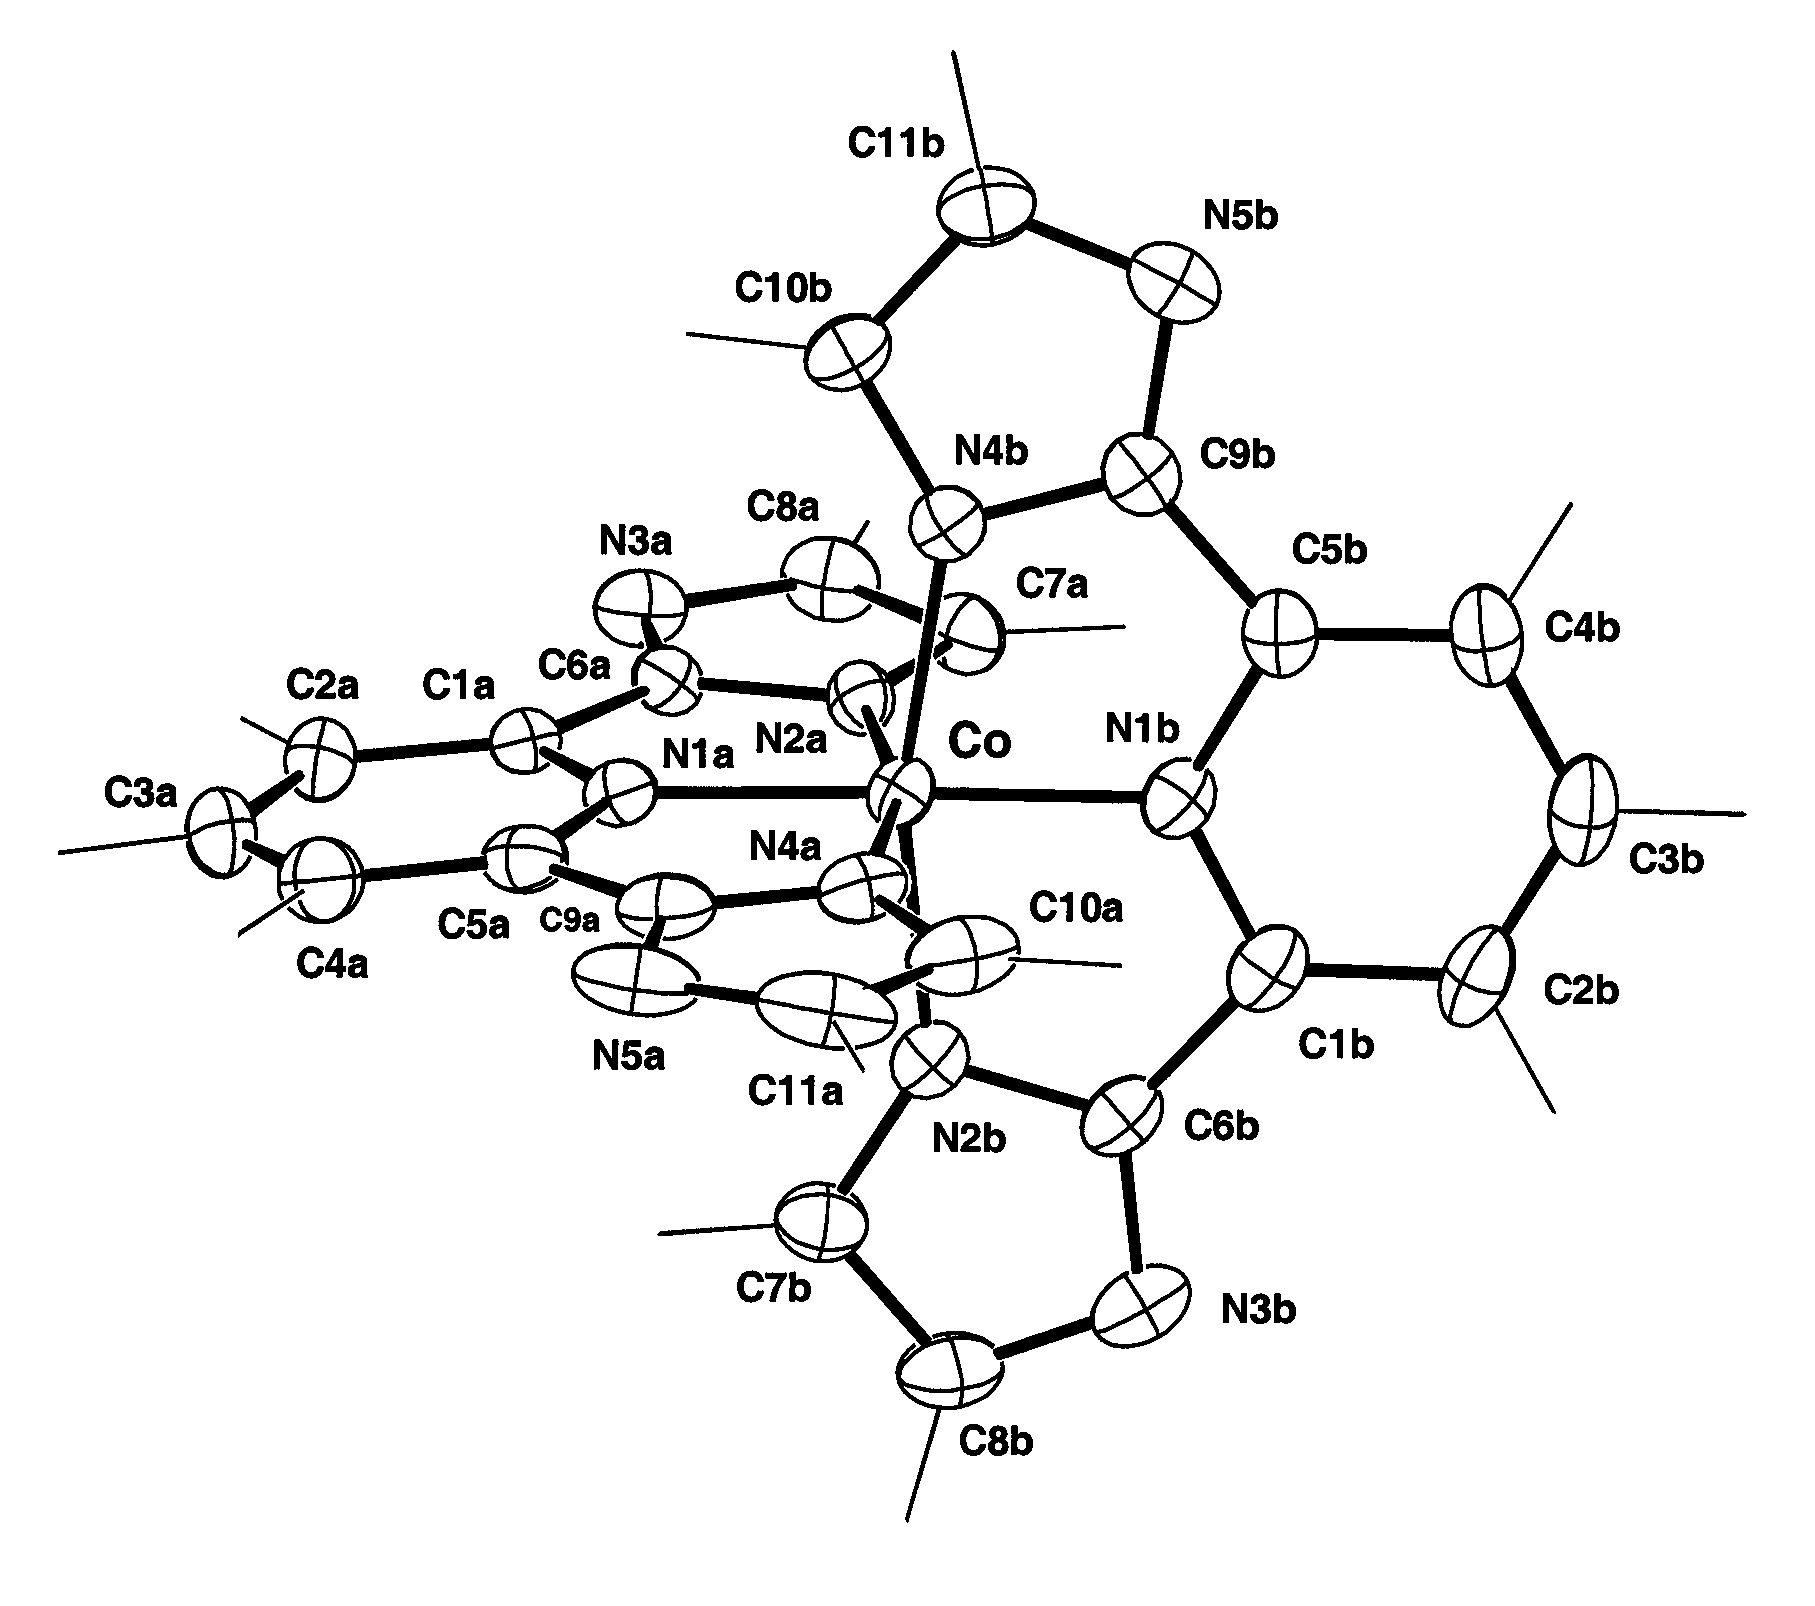


**Figure S3**. Ortep view of the [Co(**1**-2H)2] complex with atom numbering. Ellipsoids are represented with 40% probability.
